# Supplementary material for: Zooplankton communities in the Drake Passage through environmental boundaries: a snapshot of 2010, early spring
Source: PeerJ. 2019 Nov 7;7:e7994. doi: 10.7717/peerj.7994 (PMC6842557; doi:10.7717/peerj.7994)
Supplement: Supplemental Information 1 — Abundances are expressed in number of individuals per cubic meter; biomass values are in gramm of wet weight per cubic meter. [file peerj-07-7994-s001.xlsx]

## Sheet: Abundance
Abundance (ind. m-3)
Species	2259 0-45	2259 45-173	2259 170-300	2259 297-1000	2261 0-50	2261 50-180	2261 180-300	2263 0-50	2263 50-190	2263 190-300	2264 0-130	2264 130-235	2264 235-300	2265 0-60	2265 60-180	2265 180-250	2265 250-300	2265 296-1000	2266 0-56	2266 55-200	2266 200-300	2267 0-70	2267 70-220	2267 220-300	2268 0-50	2268 50-200	2268 200-300	2269 0-51	2269 50-200	2269 200-300	2270 0-50	2270 50-200	2270 200-300	2271 0-55	2271 55-160	2271 160-300	2271 296-1000	2272 0-106	2272 110-218	2272 210-319	2275 0-120	2275 120-210	2275 210-300
Foraminifera	177.78	207.03	10.38	1.71	80	76.92	3.42	140	78.57	4.09	69.23	38.57	4.62	156.33	28.33	2.86	6	0.21	196.43	2.21	15	0	0	0	0	0	0	0	220	6	237.6	120	16.5	145.45	200	37.5	1.92	122.64	101.85	61.93	250	171.67	130
Radiolaria	0	7.81	0.23	0.21	380	0	0.83	360	3.57	0.55	107.69	54.29	9.23	145.83	61.67	14.29	8	2.77	196.43	0.48	15	0	0	0	0	0	0	0	260	14.3	137.6	220	24.8	109.09	85.71	39.64	1.49	80.19	88.89	100.46	100	36.67	38.33
Medusae	2	0	0	0	3.4	0.46	0	4.4	0.21	0.09	1.38	0.19	0	1.83	0.42	0	0	0	1.61	0	0	1.86	0.07	0.25	0.6	0.4	0.1	1.96	0.53	0	3.8	0.2	0	0.36	0.38	0.07	0	0.19	0.09	0	0.58	0	0
Tomopteris sp.	0.44	0	0	0	0	0.08	0	0	0	0	0	0	0	0	0	0	0	0	0	0	0	0	0	0	0	0.07	0	0	0	0	0	0	0	0	0	0	0	0	0	0	0.08	0.11	0
Polychaeta	74.89	3.98	0.77	0.13	82.4	7	0.33	20.8	37.5	0.36	49.54	1.62	3.23	100.67	2.5	0.71	4.6	0.13	67.86	0.41	0.9	22.43	16.53	1.13	26	18.67	1.8	1.96	7.33	0.4	82.4	2.2	0.3	32.73	18.29	0.29	0.04	59.25	1.2	1.93	14.25	3.22	0.78
Pteropoda	7.11	0.08	0	0	3.2	0	0	3.4	0	0	1	0	0	2.5	0.33	0	0	0	3.57	0	0	5.43	1.13	0	0.8	0.33	0	4.71	1.07	0	5	0.53	0	8	1.14	0	0.03	5.66	0	0	0.25	0	0
Gastropoda	0.44	0.08	0.15	0	0	0.08	0.08	0	0	0.18	0.77	0	0	0.17	0.17	0	0	0	0	0	0	0	0	0	0	0.07	0.3	0	0.27	0	0.2	0.07	0	0	0.38	0.21	0	0.47	0.09	0.09	0	0	0
Ostracoda	0	2.5	4.77	0.1	0	0.54	3.58	0.2	6.79	5.73	23.38	2.29	3.08	8	12.58	2.14	4.4	0.47	2.5	0.14	1.7	1.86	30.4	2	0.4	27.47	1.4	0.98	20.27	2.5	9.4	22.67	2.1	7.27	13.71	3.64	0.09	5.38	6.48	3.3	4.42	1.22	1
Harpactikoida	0.22	0	0	0.01	0	0	0	0.2	0.07	0.27	0.38	0	0	1	0	0	0.4	0.01	0.18	0.34	0	0	0	0	0	0	0	0	0	0.1	0.2	0	0.1	0.18	0	0	0	0	0	0.09	0.17	0	0
Aetideidae gen.sp. 1	0	0	0	0	0	0	0	0	0	0	0	0	0.15	0	0	0	0	0	0	0	0	0	0	0	0	0	0	0	0	0	0	0	0	0	0	0	0	0	0	0	0	0	0.11
Aetideidae gen.sp. 2	0	0	0	0	0	0	0	0	0	0	0	0	0	0	0	0	0	0	0	0	0	0	0	0	0	0.13	0	0	0	0	0	0.13	0	0	0	0	0	0	0.09	0	0	0	0
Aetideidae gen.sp. 3	0	0	0.08	0.04	0	0	0	0	0	0	0	0	0	0	0	0	0.2	0.03	0	0	0	0	0.13	0	0	0	0	0	0	0.1	0	0.13	0	0	0.19	0	0.01	0	0	0	0	0	0
Aetideidae gen.sp. 4	0	0	0	0	0	0	0	0	0	0	0	0	0	0	0	0	0	0.01	0	0	0	0	0.07	0	0	0	0	0	0	0	0	0.07	0	0	0.1	0	0	0	0	0	0	0	0
Aetideidae gen.sp. F	0	0	0	0	0	0	0	0	0	0	0	0	0	0	0	0	0	0	0	0	0.1	0	0	0	0	0	0	0	0	0	0	0	0	0	0	0	0	0	0	0	0	0	0
Aetideus armatus F	0	0	0	0	0	0	0	0	0	0.09	0.15	0.1	0	0	0.33	0	0.4	0.01	0	0	0	0	0.47	0	0.2	0.33	0	0	0.6	0	0	0.47	0	0	0.67	0.21	0	0	1.11	0	0.08	0	0
Aetideus armatus M	0	0	0	0	0	0	0.08	0	0	0	0	0	0	0	0	0	0	0	0	0	0	0	0.2	0	0	0.13	0.1	0	0.2	0	0	0.47	0	0	0	0.5	0	0	0.19	0.64	0	0	0.11
Aetideus sp. 1-5	0	0.08	0.15	0	0	0.08	0.17	0	0.21	0.73	0.08	0.1	0	0	0.17	0.43	0.2	0	0	0	0	0	0.73	0	0	0.4	0.1	0	0.93	0	0	0.47	0	0	1.14	0	0.01	0	0.09	0.28	0	0.22	0.33
Amallothrix dentipes 1-5	0	0	0	0.06	0	0	0	0	0	0	0	0	0	0	0	0	0.2	0.26	0	0	0	0	0	0.5	0	0	0.1	0	0	0	0	0	0.2	0	0	0.36	0.01	0	0	0	0	0	0
Amallothrix dentipes F	0	0	0.08	0.01	0	0	0	0	0	0	0	0	0	0	0	0	0	0.03	0	0	0.1	0	0.13	0.38	0	0.07	0	0	0	0.2	0	0	0.1	0	0	0.21	0	0	0	0	0	0	0.22
Amallothrix dentipes M	0	0	0	0.01	0	0	0	0	0	0	0	0	0	0	0	0	0	0	0	0	0	0	0	0	0	0	0	0	0	0	0	0	0	0	0	0	0	0	0	0	0	0	0
Calanidae gen.sp.1 1-3	0	0	0.15	0.07	0	0.08	0	0	0	1.36	0	0	0	0	0	0	0	0.11	0	0	0.1	0	0	2.88	0	0	0	0.2	0	0.4	0	0	0	0	0	0.07	0.03	0	0	0.18	0	0	0
Calanidae gen.sp.1 4-5	0	0	0.08	0.06	0	0	0	0	0	0	0	0	0	0	0	0	0	0	0	0	0	0	0	0	0	0	0	0	0	0	0	0	0.4	0	0	0	0	0	0	0.09	0	0	0
Calanidae gen.sp.2 1-5	0	0	0.23	0.33	0	0	0	0	0	0	0	0	0	0	0	0	0	0.26	0	0	0.3	0	0	0.5	0	0	0	0	0	0	0	0	0	0	0	0	0.01	0	0	0	0	0.11	0
Calanidae gen.sp.2 F	0	0	0	0.1	0	0	0	0	0	0	0	0	0	0	0	0	0	0.09	0	0	0	0	0	0	0	0	0	0	0	0	0	0	0	0	0	0	0	0	0	0	0	0	0
Calanoides acutus 1	0.44	0.08	0	0	0	0.08	0	0.4	0.21	0	1	0	0	2.67	0	0	0	0	3.93	0	0	5	0	0	3.4	0	0	3.14	0.27	0	10	0.2	0	1.64	1.24	0	0	3.3	0.09	0	1.17	0	0
Calanoides acutus 2	0	0	0	0	0	0	0	0	0	0	0.08	0	0	0.17	0	0	0	0	0.36	0	0	0	0	0	0.2	0	0	0	0.2	0	3.2	0.13	0	0.18	0.1	0	0	0.38	0	0	0.08	0	0
Calanoides acutus 3	0	0.31	0	0	0	0.08	0	0	0.14	0	0.08	0	0	0	0	0	0	0	0	0	0	0	0	0	0	0	0	0	0.2	0	0	0	0	0	0	0	0	0.47	0	0	0	0	0
Calanoides acutus 4	0	2.19	0.08	0	0.4	2	0	0	5.79	0	2.46	0.19	0	0.17	0.17	0	0	0.03	0.71	0	0	0.57	0.4	0	0	1.53	0	0	0.2	0	0	0.67	0	0.18	0.67	0	0	0	0	0	0	0	0
Calanoides acutus 5	3.33	4.14	0	0	1.6	11.31	0	2.8	18.29	0.09	8.62	0.1	0	1.33	1.33	1.86	0	0.07	0.89	0	0	1.29	3.2	0.25	0.2	4.2	0.5	0.78	1.47	0.2	1.2	2.87	0	0.36	1.9	0.14	0	1.13	0.19	0	0	0	0.11
Calanoides acutus F	0.89	0.23	0	0	1.6	1.31	0	1	3.79	0	2	0	0	1.83	0.33	0	0	0	0.71	0.07	0	1	0.33	0	1.4	0.73	0.2	0.98	0.27	0	1	0.13	0	1.82	0.57	0	0	0.85	0.09	0	0.17	0	0
Calanoides acutus M	0	0	0	0.01	0	0	0	0	0	0	0	0	0	0	0	0	0	0	0	0	0	0	0	0	0	0	0	0	0	0	0	0	0	0	0	0	0	0	0	0	0	0	0
Calanus simillimus 1	0	0	0	0	0	0	0	0	0	0	1.92	0	0	1.5	0	0	0	0	6.79	0	0	6.29	0.6	0	5.6	0	0	5.1	1.47	0	10.6	0.2	0	9.82	4.76	0.07	0	7.45	0	0	0.92	0.22	0.11
Calanus simillimus 2	0	0	0	0	0	0	0	0	0.07	0	1.62	0	0	1.5	0	0	0	0	5.18	0	0	5.57	0	0.13	5.4	0	0	4.71	0.33	0	6.2	0.2	0	4	1.71	0	0	5.75	0	0	0.92	0	0
Calanus simillimus 3	0	0	0	0	0	0	0	0	0	0	0.77	0	0	0.83	0	0	0	0	1.43	0	0	1.57	0.33	0	4.4	0.07	0	1.37	0.4	0	4.8	0.07	0	1.27	1.05	0	0	2.26	0.09	0	0.58	0	0
Calanus simillimus 4	0	0.16	0	0	0	0.15	0	0	0.29	0	0.23	0	0	0.67	0.08	0	0	0	0.89	0	0	0.57	0.07	0	1	0.27	0	0.39	0.27	0	1.6	0.27	0	0.73	0.29	0	0	0.66	0.09	0	0.58	0.11	0
Calanus simillimus 5	0.44	0.78	0.54	0	0.6	1.54	0.42	0.2	1.14	0.27	0.46	0.1	0	0.17	0.08	0	0.4	0.01	0.18	0	0	1.14	0.07	0.13	0.8	0.67	0	0.2	0.4	0.1	0.8	0.67	0	0.18	0.86	0	0	0.38	0.19	0	0.17	0.11	0
Calanus simillimus F	0.67	1.09	0.23	0	0.8	1	0	0.6	4.07	0.09	7	0	0.15	10.83	0.75	0.14	0	0.01	20.54	0	0.1	10.43	3.13	0.13	19.2	2.4	0.1	17.45	2.33	0.2	19	1.93	0	23.09	7.33	0.14	0	13.87	1.3	0.09	1.5	0.11	0.11
Calanus simillimus M	0.22	0.63	0.08	0.09	0	0.15	0	0	1.21	0.09	3.62	0	0	4	0.83	0	0	0.11	0.71	0	0	1.86	2.87	0.25	10.4	1.27	0.1	1.76	2.4	0.4	1.4	1.47	0	2.91	3.14	0	0.03	0.94	1.67	0.09	0.08	0	0
Calanus propinquus 1	0.44	0.08	0	0	0	0	0	0	0	0	0	0	0	0	0	0	0	0	0	0	0	0	0	0	0	0	0	0	0.07	0	0	0	0	0	0	0	0	0	0	0	0	0	0
Calanus propinquus 2	0	0.08	0	0	0	0	0	0	0	0	0	0	0	0	0	0	0	0	0	0	0	0	0.07	0	0	0	0	0	0	0	0	0	0	0	0	0	0	0	0	0	0	0	0
Calanus propinquus 3	0	0	0	0	0	0	0	0	0	0	0.08	0	0	0	0	0	0	0	0	0	0	0	0	0	0.2	0	0	0	0	0	0	0	0	0	0	0	0	0	0	0	0	0	0
Calanus propinquus F	0	0	0	0	0	0.08	0	0	0	0	0	0	0	0	0	0	0	0	0	0	0	0	0	0	0	0	0.1	0	0	0	0	0	0	0	0	0	0	0	0	0	0	0	0
Calanus sp.1 1	0	0	0	0	0	0	0	0.4	0.14	0	0	0	0	0	0	0	0	0	0	0	0	0	0	0	0	0	0	0	0	0	0	0	0	0	0	0	0	0	0	0	0	0	0
Calanus sp.1 2	0	0	0	0	0.2	0	0	0	0.07	0	0	0	0	0	0	0	0	0	0	0	0	0	0	0	0	0	0	0	0	0	0	0	0	0	0	0	0	0	0	0	0	0	0
Calanus sp.2 1	0	0	0	0	0	0	0	0	0	0	0	0	0	0	0	0	0	0	0	0	0	0	0	0	0	0	0	0	0	0	0	0	0	0	0	0	0	0	0	0	0	0	0.44
Calanus sp.2 2	0	0	0	0	0	0	0	0	0	0	0	0	0	0	0	0	0	0	0	0	0	0	0	0	0	0	0	0	0	0	0	0	0	0	0	0	0	0	0	0	0	0	0.11
Candacia simplex F	0	0	0	0	0	0	0	0	0	0	0	0	0	0	0	0	0	0	0	0	0	0	0	0	0	0	0	0	0	0	0	0	0.1	0	0	0	0	0	0	0	0	0	0
Candacia sp. 1-5	0	0	0.15	0	0	0	0	0	0.07	0	0.31	0	0	0	0	0	0	0	0	0	0	0	0.27	0	0	0.33	0	0	0.07	0	0.2	0	0.1	0	0	0	0	0.09	0	0.09	0	0	0
Clausocalanus laticeps F	0	0	0	0	0	0	0	0	0.5	0	15	0.19	0	29	0.75	0.57	1	0.26	5	0.07	1	8.29	15.4	0.5	1	29.87	0.9	0.78	13.33	1	32.8	3.07	0.9	11.09	4.95	0.36	0.04	5.47	1.94	0.55	0.42	0	0.22
Clausocalanus laticeps M	0	0	0	0	0	0	0	0	0.07	0.09	3.69	0.57	1.38	0.5	1.75	0.29	0.6	0.01	0	0	0.7	0	1.73	1.38	0	3.13	0	0	4	0.3	4.4	1.6	0	0.55	2.86	1.29	0	0.28	0.65	0.92	0.08	0	0.11
Clausocalanus sp. F	0	0	0	0	0	0	0	0	0	0	0	0	0	0	0	0	0	0	0	0	0	0	0	0	0	0.13	0	0	0	0	0	0	0	0	0	0	0	0	0	0	0	0	0
Clausocalanus sp. M	0	0	0	0	0	0	0	0	0	0	0	0	0	0	0	0	0	0	0	0	0	0	0	0	0	0.2	0	0	0	0	0	0	0	0	0	0	0	0	0	0	0	0	0
Clausoicalanus brevipes F	0	0	0	0	0	0	0	0	0	0	0.31	0.1	0	0.83	0.5	0.14	0	0	0	0	0	0	1.13	0.13	0	0.4	0.1	0	0.73	0.4	0.2	0.8	0	0.36	0.48	0.43	0	0	0.09	0.37	0.5	0.89	0.44
Clausoicalanus brevipes M	0	0	0	0	0	0	0	0	0	0	0	0	0	0	0	0	0	0	0	0	0	0	0.07	0	0	0	0	0	0	0	0	0.13	0	0	0	0	0	0	0	0	0	0	1.22
Ctenocalanus sp. F	102.89	23.13	0.54	0	42.4	17.31	0.17	10.8	85.71	0.73	76.92	1.14	0.62	125	3.58	1.71	1	0.14	48.57	0	0.8	78.29	59.27	0.88	6.2	78.67	0.7	0.98	59.13	0.5	162.6	10.93	0.5	32.73	24.76	0.43	0	40.75	1.39	0.73	11.5	1.11	0.44
Ctenocalanus sp. M	0	1.25	0.08	0.01	0	0.54	0	0	1.29	0	0.62	0.1	0	0.17	0.5	0.29	0.2	0.06	0	0	0.5	0	1.2	1	0	1.53	0.1	0	0.87	0.1	0	1.6	0	0	2.1	0.07	0	0.19	0.19	0.73	0	0	0.89
Ctenocalanus/Clausocalanus 1-5	89.56	95.31	2	0.09	88.8	45.38	0.75	52.8	184.29	2.55	267.69	4.57	4.46	541.67	23	2.86	7	0.85	410.71	2.69	3.8	348.57	248	8.25	92	194.67	6	24.31	224	1	1225	138.67	4.2	498.18	213.33	3.64	0.16	284.91	6.39	5.23	185.92	21.67	6.67
Euchirella similis 1-5	0	0	0	0	0	0	0	0	0	0	0	0	0	0	0	0	0	0	0	0	0	0	0	0	0	0	0.1	0	0	0	0	0	0	0	0	0	0	0	0	0	0	0	0
Gaetanus sp. 1-5	0	0	0	0.03	0	0	0	0	0	0	0	0	0	0	0	0	0	0.01	0	0	0	0	0	0	0	0	0	0	0	0	0	0	0	0	0	0	0	0	0	0	0	0	0
Gaetanus tenuispinus F	0	0	0	0	0	0	0	0	0	0	0	0	0	0	0	0	0	0.03	0	0	0	0	0	0	0	0	0	0	0	0	0	0	0	0	0	0.07	0.01	0	0	0.09	0	0	0
Gaetanus tenuispinus M	0	0	0	0.03	0	0	0	0	0	0	0	0	0	0	0	0	0	0	0	0	0	0	0	0	0	0	0	0	0	0	0	0	0	0	0	0	0.01	0	0	0	0	0	0
Haloptilus oxycephalus	0.22	0.78	0	0	0	0.62	0	0.4	1.5	0	1.08	0.19	0	0.5	0	0	0	0	0.18	0	0	0.14	0.27	0	0.8	0.2	0	0.2	0.53	0	0.2	0.33	0	1.45	0.1	0	0	0.38	0.09	0	0.25	0	0
Heterorabdidae gen.sp. 1-5	0.22	0.31	4.23	0.3	0	0.23	1.75	0	0.43	3.64	0.15	4	3.08	0.17	0.5	1.57	1.2	0.3	0	0	2.2	0	0.27	3	0	0.07	2.9	0	0.4	1.7	0	1.13	1.8	0	0.38	1.79	0.04	0	0.19	2.48	0	0.44	0.56
Heterorabdus austrinus F	0	0	0.08	0	0	0.15	0	0	0	0	0	0	0	0	0.08	0	0	0.03	0	0	0	0	0.07	0	0	0.07	0	0	0	0	0	0	0	0	0.1	0	0.01	0	0	0	0	0	0
Heterorabdus austrinus M	0	0	0	0.04	0	0	0	0	0	0	0	0	0	0	0	0	0	0.03	0	0	0.1	0	0	0	0	0	0	0	0	0.1	0	0	0	0	0	0	0.03	0	0	0	0	0	0
Lucicutia sp. 1-5	0	0	0	0.65	0	0	0	0	0	0	0	0	0	0	0	0	0	0.68	0	0	0	0	0	0	0	0	0	0	0	0	0	0	0	0	0	0	0.04	0	0	0	0	0	0
Lucicutia sp. F	0	0	0	0.04	0	0	0	0	0	0	0	0	0	0	0	0	0	0.03	0	0	0	0	0	0	0	0	0	0	0	0	0	0	0	0	0	0	0	0	0	0	0	0	0
Lucicutia sp. M	0	0	0	0.01	0	0	0	0	0	0	0	0	0	0	0	0	0	0	0	0	0	0	0	0	0	0	0	0	0	0	0	0	0	0	0	0	0	0	0	0	0	0	0
Metridia sp. 1-3	0	0	0.08	0	0	0	0	0	0	0	0	0	0	0	0	0	0	0	0	0	0	0	0	0	0	0	0	0	0	0	0	0	0	0	0	1.79	0	0	0	0.18	0	0	0.44
Metridia curticauda 1-5	0	0	0	0.21	0	0	0	0	0	0	0	0	0	0	0	0	0	0.43	0	0	0	0	0	0	0	0	0	0	0	0	0	0	0	0	0	0	0.04	0	0	0.09	0	0	0
Metridia curticauda F	0	0	0	0.13	0	0	0	0	0	0	0	0	0	0	0	0	0	0.23	0	0	0	0	0	0	0	0	0	0	0	0	0	0	0	0	0	0	0.11	0	0	0	0	0	0
Metridia curticauda M	0	0	0	0.13	0	0	0	0	0	0	0	0	0	0	0	0	0	0.1	0	0	0	0	0	0	0	0	0	0	0	0	0	0	0	0	0	0	0.13	0	0	0	0	0	0
Metridia gerlachei 1-5	0	0.08	0	0.03	0	0	0	0	0	0	0	0	0	0	0	0	0	0	0	0	0	0	0	0	0	0	0	0	0	0	0	0	0	0	0	0	0	0	0	0	0	0	0
Metridia gerlachei F	0.22	0.08	0	0.01	0	0	0	0	0	0	0	0	0	0	0	0	0	0	0	0	0	0	0	0	0	0	0	0	0	0	0	0	0	0	0	0	0	0	0	0	0	0	0
Metridia gerlachei M	0	0	0	0.03	0	0	0	0	0	0	0	0	0	0	0	0	0	0	0	0	0	0	0	0	0	0	0	0	0	0	0	0	0	0	0	0	0	0	0	0	0	0	0
Metridia lucens 1	0.44	7.11	4.54	0	0	1.23	0.33	0	8	2.55	0	6.19	0.62	0	1.33	4.57	1	0	0	0.14	0.5	0	4.2	1	0	2.8	0.5	0.78	2.87	0.9	0	6.13	1.7	0	1.05	3.14	0	0	1.67	3.3	1.75	6.44	0.56
Metridia lucens 2	0	0.63	0.15	0.01	0	0.23	0.17	0	2.14	0.18	0.08	1.05	0	0	0.75	1.29	0.2	0	0	0	0.2	0	0.33	0.63	0	1.2	0.2	0.2	1.47	0.3	0	1.2	0	0	0.57	1.29	0	0	0.56	2.57	0.42	4.33	0.56
Metridia lucens 3	0	0.55	0.23	0.01	0	0.08	0.08	0	1.07	0.27	0	0.29	0	0	0.5	0.43	0	0.03	0	0	0.2	0	0.2	0.13	0.2	0.47	0.2	0	0.4	0.3	0	0.33	0.3	0	0.19	0.57	0	0	0.09	1.01	0	0.67	0.67
Metridia lucens 4	0.22	0.7	0.08	0.03	0.2	0.08	0	0	0	0.09	0.08	0.1	0	0	0.25	0	0.2	0	0	0	0.2	0	0.07	0.13	0	0.13	0	0	0.07	0.3	0	0.13	0	0	0.1	0.29	0	0	0	0.09	0	0.11	0.33
Metridia lucens 5	0	0.47	0.08	0.01	0	0.15	0.08	0.2	0	0.09	0.23	0	0	0	0	0	0	0.01	0	0	0.1	0	0.13	0.25	0	0	0	0	0	0.2	0	0	0	0	0.1	0	0	0	0	0.28	0	0	0.44
Metridia lucens F	2	1.48	0	0.01	0	0.15	1	0	0.64	0.45	1.38	1.33	1.23	2	4.92	0	0	0.03	0	0.28	3.1	0	1.53	1.25	0	2.27	0.2	0	0.2	2.6	0	3.13	3.4	9.09	3.14	0	0	0.09	0.74	2.11	0	0	0.44
Metridia lucens M	0	0	0	0.01	0	0	0	0	0	0.09	0.08	0.1	0.15	0	0.08	0.14	0	0.07	0	0	0	0	0.13	0.13	0	0.13	0	0	0.2	0.1	0	0.07	0.1	0	0.29	0.21	0	0	0.19	0.46	0	0	0
Microcalanus pygmaeus 1-5	0	2.81	9.46	0.38	0.2	0.54	2.17	0	1.79	9	0.08	0.67	3.38	0	0.17	0.29	6	0.17	0	0.14	3.5	0	0	21.25	0	1.07	0.4	0	0	6.3	0	1	4.4	0	0	2.57	0.13	0	0.28	8.81	0.08	2.44	4.89
Microcalanus pygmaeus F	1.56	8.13	2.77	0.23	0.2	1.23	0.67	0.2	7.5	0.64	0.15	1.9	1.08	0	0.33	1.71	1.4	0.51	0	0.07	2.3	0.14	2.27	19.38	0	6.67	0.6	0	0	2.3	0	1.27	2.3	0	0.29	2.57	0.06	0	0.46	6.33	0	0	0
Microcalanus pygmaeus M	0	0.08	0.31	0	0	0.15	0.58	0	0	0.36	0	0.19	0.15	0	0	0	0.2	0	0	0	0	0	0	0.63	0	0	0.4	0	0	0.2	0	0	0	0	0	0	0	0	0	0.09	0	0	0
Microcalanus nauplii	3.56	0	0.31	0.01	0.4	0	0.17	2.4	0.14	0.09	0.23	0.29	0.31	1.17	0	0.71	2	0.01	0.71	0.48	0.3	17.14	0	0	2.6	0.8	0.1	2.94	0.27	0.2	0	0.13	0	0	0	0.07	0	0.75	0.19	0.64	1.67	0.44	0
Mormonilla sp.	0	0	0	0	0	0	0	0	0	0	0	0	0	0	0	0	0	0.07	0	0	0	0	0	0	0	0	0	0	0	0	0	0	0	0	0	0	0	0	0	0	0	0	0
Neocalanus tonsus F	0	0	0	0	0	0	0	0	0	0	0	0	0	0	0	0	0	0	0	0	0	0	0	0	0	0	0	0	0	0	0	0.07	0	0	0	0	0	0	0	0	0	0	0
Oithona frigida	0.67	11.56	7.62	0.68	0	1.62	3.67	0.2	15.36	18	24.62	20.57	2.46	0	19	14.29	2	0.89	0	0.07	2.3	0	46.73	5.38	1	74.67	5.1	1.76	38.67	7.2	0	37.33	2.3	0.18	22.48	11.79	0.04	0	11.85	12.11	2.08	6.33	0.56
Oithona sp. <1 mm 1-5	1040	562.5	47.31	1.11	656	146.92	10.5	2050	452.86	26.18	1392.31	41.43	16.62	2198	61.67	19	17.8	1.32	1875	8.28	7.2	1442.86	589.33	29.38	1580	576.67	27.3	784.31	550	12.4	1987.6	383.33	8.7	538.18	547.62	11.57	0.33	735.85	66.02	44.04	602.17	30.67	14.56
Oncaea sp.	8.44	132.81	6.92	3.5	0.8	49.23	4.25	0.8	77.14	8.45	60	15.43	12.92	2.5	30	21.86	12.4	5.16	0.18	1.66	15	0.43	44.47	21.25	1	70	3.8	2.75	37.07	16.3	0.2	27.73	12.4	1.45	24	21.64	0.34	0.19	22.59	15.14	0.17	1.67	9
Pareuchaeta spp. 1	0.44	2.89	0.85	0	0	1.38	0.33	0.6	2.86	1.82	0.08	1.62	1.69	0	1.17	2	0.4	0.01	0.18	0	0.8	0.14	2.87	0.5	0	2.27	1.7	0	1	0.9	0	0.93	0.9	0	0	1.07	0.01	0	0.37	1.1	0	0.11	1.11
Pareuchaeta spp. 2	0.44	2.66	0.38	0	0	1.46	0.33	0	6.79	0.82	4.92	1.05	0.15	1	3.58	2	0.2	0.03	0.18	0	0.3	0.57	3.87	0.13	0	6.4	0.3	0.59	2.87	0.5	0	3.27	0.2	0	2.95	1.79	0	0.47	2.04	1.19	0	0.22	0.11
Pareuchaeta spp. 3	0	0.08	0.08	0	0	0.15	0	0	0.21	0.82	3.85	0.19	0.15	0.67	1.92	1	1.2	0.1	0	0.07	0.3	0.43	4.6	0	0.4	4.33	0.1	0.2	2.27	0	0	1.47	0.2	0.73	3.52	0.64	0.01	0.38	1.02	0.55	0	0.22	0.33
Pareuchaeta spp. 4	0	0	0	0.01	0	0	0	0	0	0	0.08	0	0	0	0.25	0	0	0.03	0	0	0.3	0	0.53	0.13	0	0	0.1	0	0.07	0.1	0	0.33	0	0.18	0.57	0	0.01	0	0.09	0.18	0	0	0
Pareuchaeta spp. 5	0	0	0.08	0.06	0	0	0	0	0	0	0	0	0	0	0	0	0	0.01	0	0	0.1	0	0	0	0	0	0	0	0	0	0	0	0.1	0	0	0.07	0.01	0	0	0.18	0	0	0
Pareuchaeta spp. F	0	0	0	0.01	0	0	0	0	0	0	0	0	0	0	0	0	0	0.01	0	0	0	0	0	0	0	0	0	0	0	0	0	0.13	0	0	0	0.14	0.01	0	0.09	0	0	0	0
Pareuchaeta spp. M	0	0	0	0.01	0	0	0	0	0	0	0	0	0	0	0	0	0	0	0	0	0	0	0	0	0	0	0	0	0	0	0	0	0	0	0	0	0.01	0	0	0	0	0	0
Pleuromamma robusta 1-5	0	0	0.15	0.01	0	0	0.08	0	0	0.27	0	0	0.15	0	0.25	0.86	0.4	0.06	0	0	0.9	0	0	0.13	0	0.33	0	0	0	0.4	0	0.53	0.6	0	0.38	2	0.01	0	0	0.28	0	0.33	0.67
Pleuromamma robusta F	0	0	0	0	0	0	0	0	0	0	0	0	0	0	0.67	0	0	0.01	0	0	0	0	0	0	0	0	0	0	0	0	0	0	0.3	0	2.67	0.86	0.01	0	0	0	0	0	0
Pleuromamma robusta M	0	0	0	0.01	0	0	0	0	0	0	0	0	0	0	0.08	0	0	0.09	0	0	0	0	0	0	0	0	0	0	0	0	0	0	0.2	0	0.1	0.07	0.04	0	0	0	0	0	0
Rhincalanus gigas 2	0	0.55	0	0	0	0.38	0	0	1.07	0	0.92	0.1	0	0	0.33	0	0	0	0	0	0	0	0.6	0	0	1.73	0.1	0	0.13	0	0	0.13	0	0	0.48	0	0	0	0.09	0	0	0	0
Rhincalanus gigas 3	0.22	0.47	0	0	0	0.23	0	0	0.79	0	2	0.29	0	0	0.83	0.57	0.4	0	0	0	0.1	0.14	3.33	0	0	2.8	0.2	0.39	1.93	0	0	1.13	0	0	1.05	0	0	0.09	0.19	0	0.08	0	0
Rhincalanus gigas 4	0.44	2.03	0	0	0	1.15	0	0	3	0	0.46	0.19	0	0	0.67	0.71	0	0.01	0.36	0	0	0.43	1.53	0	0	1.6	0.2	0.2	1.8	0	0	1.33	0	0	1.43	0.07	0	0.28	0.19	0	0.08	0.11	0
Rhincalanus gigas 5	0	4.69	0.08	0	0	5.15	0	0	8.21	0	3.85	0	0.46	1.17	0.83	0.57	0.6	0.06	1.96	0	0.2	2.29	2.4	0.13	0.6	3	0.5	0.2	2.07	0.2	1.8	1.8	0	0.55	1.9	0.14	0.03	0.94	1.48	0	0.25	0.11	0
Rhincalanus gigas F	0.67	1.25	0	0	1	2.54	0	0.8	8.07	0	3.69	0	0	1.83	1.25	0.14	0.2	0.09	0.54	0	0.1	2	2.47	0	0.6	3.8	0.5	3.92	0.93	0.1	4.8	0.53	0.1	1.09	1.52	0	0	3.58	0.37	0	1.83	0	0
Rhincalanus gigas M	0	0	0	0.03	0	0.15	0.08	0	0.36	0	0.08	0	0	0	0	0	0	0.04	0	0	0.1	0	0.27	0.13	0	0	0	0	0	0.2	0.2	0.33	0.2	0.18	0.19	0.07	0	0.28	0.09	0.09	0.08	0	0
Rhincalanus nasutus 1-5	0	0	0	0	0	0	0	0	0	0	0	0	0	0	0	0	0	0	0	0	0	0	0	0	0	0	0	0	0	0	0	0	0	0	0	0	0	0	0	0	0.08	0	0
Rhincalanus sp. nauplii	6	2.81	0	0	4	0.31	0	14.4	2.07	0.09	1.46	0.19	0.15	0.83	0	0	0	0	0	0	0	0	0	0	1.6	0	0	0.59	0	0	0	0	0	1.27	0	0	0	0	0	0	8.17	0.78	0.44
Scaphocalanus sp. 1-5	0	0	1.38	0.03	0	0	0.08	0	0	0	0	0	0	0	0	0	0.6	0.16	0	0	0	0	0.13	0	0	0	0	0	0	0	0	0	0	0	0	0	0	0	0	0	0	0	0
Scaphocalanus sp. F	0	0	0.23	0.03	0	0	0.25	0	0	0	0	0	0	0	0	0	0	0.06	0	0	0	0	0	0	0	0	0	0	0	0	0	0	0	0	0	0	0	0	0	0	0	0	0.11
Scolecithricella minor 1-5	0	4.38	1.85	0.04	0	1.46	1.67	0	10	2.18	10.15	0.48	2.92	1.67	3.17	0.71	1.2	0.16	0.18	0	1.1	0	8.73	6.25	0.2	12	0.2	0	5.07	1.7	0	7.2	1.1	0.18	2.76	1.29	0.01	0	1.11	1.47	0.58	0.78	1.22
Scolecithricella minor F	0.22	0.31	0	0	0	0.31	0	0	0.29	0	3.23	0.48	0.77	2.5	1.58	0.43	0.4	0	0	0	0.5	0	3.8	0.25	0.2	4	0.2	0	3.6	0.6	0.8	2.87	0	0.55	4.67	0.79	0	0.19	1.3	0.83	0.42	0.44	0.78
Scolecithricella minor M	0	0.08	0	0.01	0	0	0	0	0	0.09	1	0	0	0.17	0.33	0.14	0	0.04	0	0	0.1	0	0.53	0.13	0	0.87	0	0	1.13	0.4	0	1.07	0	0	1.24	0.07	0	0.19	0.37	0.09	0	0.22	0.11
Subeucalanus longiceps 1-5	0	0.16	0	0.04	0	0.08	0	0	0	0	0.08	0	0	0	0.25	0.14	0.2	0.06	0.18	0	0	0.14	0.07	0	0	0	0	0	0.07	0	0	0	0	0	0.95	0.07	0	0.57	0.37	0	0.08	0	0
Subeucalanus longiceps F	0	0	0	0	0	0	0	0	0	0	0.15	0	0	0	0	0	0	0.01	0.71	0	0	0.29	0.2	0	0	0.13	0	0.2	0.27	0	0.4	0.4	0	0.73	0.29	0	0	0.47	0.09	0	2.58	0.11	0
Subeucalanus longiceps M	0	0	0	0	0	0	0	0	0	0	0.31	0	0	0	0	0	0	0.01	0	0	0	0	0	0	0	0	0	0	0.07	0	0	0.07	0	0	0.19	0	0	0	0	0	0	0	0
Calanidae gen.sp.1 1-3	0	0	0.15	0.07	0	0.08	0	0	0	1.36	0	0	0	0	0	0	0	0.11	0	0	0.1	0	0	2.88	0	0	0	0.2	0	0.4	0	0	0	0	0	0.07	0.03	0	0	0.18	0	0	0
Calanidae gen.sp.1 4-5	0	0	0.08	0.06	0	0	0	0	0	0	0	0	0	0	0	0	0	0	0	0	0	0	0	0	0	0	0	0	0	0	0	0	0.4	0	0	0	0	0	0	0.09	0	0	0
Calanidae gen.sp.2 1-5	0	0	0.23	0.33	0	0	0	0	0	0	0	0	0	0	0	0	0	0.26	0	0	0.3	0	0	0.5	0	0	0	0	0	0	0	0	0	0	0	0	0.01	0	0	0	0	0.11	0
Calanidae gen.sp.2 F	0	0	0	0.1	0	0	0	0	0	0	0	0	0	0	0	0	0	0.09	0	0	0	0	0	0	0	0	0	0	0	0	0	0	0	0	0	0	0	0	0	0	0	0	0
Copepoda nauplii	106.67	7.81	2.08	0.11	40.8	1	0.67	81.6	3.93	2.18	23.38	0.95	0.77	51.83	0.25	1.14	2.6	0.14	59.29	0.62	0.1	59.43	2.13	2.38	33	0.87	0.8	20.78	8.53	0.8	130	2	0.4	56.73	4.19	0	0.06	22.26	0.56	0	9.58	0.44	1
Cyrripedia larvae	0	0	0	0	0	0	0	0	0	0.09	0	0	0	0	0	0	0	0	0	0	0	0	0.07	0.13	0	0	0	0	0	0	0	0.07	0	0	0	0	0	0	0	0	0	0	0
Decapoda larvae	0	0	0	0	0	0	0	0	0	0	0	0	0	0	0	0	0	0	0	0	0	0	0	0	0	0	0	0	0	0	0	0	0	0	0	0	0	0	0	0	0.25	0	0
Amphipoda	0	0	0	0.01	0.2	0.15	0.17	0.2	0.36	0	0.46	0	0	1	0	0	0	0.03	0.18	0	0	0.71	0.2	0	0	0	0	0.2	0.07	0	0.6	0	0.1	0.73	0.57	0.07	0	0.28	0	0	0.58	0	0.11
Thysanoessa sp.	0.22	0	0.08	0.01	0	0	0	0	0	0	0	0	0	0	0.08	0	0.4	0	0	0	0	0	0	0	0	0	0	0	0	0	8.2	0	0	0	0.19	0.07	0	0	0	0	0	0	0
Euphausiidae nauplii	0	0	0.15	0.09	0	0	0.08	0	0	0.36	0	0	0.31	0	0	0	0.6	0.16	0	0	0.1	0	0	0	0	0	0	0	0	0	0	0	0	0	0	0	0	0	0	0	1.25	0.33	0.67
Euphausiidae larvae	9.11	10	0.38	0.01	16.6	4.08	0.25	0.8	36.43	0.36	28.92	0.29	0.46	32.5	0.83	0.14	0	0.09	6.61	0.07	0	10.43	13.47	0.25	2.4	6.27	0.2	1.37	12.13	0.2	27	5.67	0.3	14.36	6.1	0.14	0	8.3	0.65	0.09	6	0	0.22
Decapoda larvae	0	0	0	0	0	0	0	0	0	0	0	0	0	0	0	0	0	0	0	0	0	0	0	0	0	0	0	0	0	0	0	0	0	0	0	0	0	0	0	0	0.25	0	0
Chaetognatha	0.22	7.81	2.38	0.46	0.2	0	0.33	0.6	6.5	1	9.54	6.57	1.69	0.5	1.92	3	1.8	0.7	1.25	0.14	0.9	0.29	4.53	2.25	0.6	4.73	1.5	0.39	27.2	1.5	0.8	8.93	1.9	0.36	12.57	1.29	0.24	2.64	2.87	1.83	8.75	6.44	3.11
Appendicularia	764.44	50	0.54	0.09	244	33.85	1.08	560	91.43	0.64	107.69	2	0.62	204.17	2.17	1	2.6	0.13	167.86	1.24	0.3	237.14	9.87	0.75	61	1.27	1.3	215.69	24.27	0	285	10.93	0.6	163.64	57.14	0.36	0.03	88.68	0.93	1.65	224.83	10.33	0.56
Appendicularia large	43.56	15.94	0	0	19.2	2.77	0	28	6.29	0	9.23	2	0.62	10	0.33	0.71	0.2	0	4.11	0	0	11.43	0	0	0.2	0	0	3.92	0.27	0	2.6	0.73	0.4	5.09	3.05	0.64	0	4.15	0.19	0	3.17	1.33	0
Salpae	0	0	0	0	0	0	0	0	0	0	0	0	0	0	0	0	0	0.01	0	0	0	0	0	0	0	0	0	0	0	0	0	0	0	0	0	0	0	0	0	0	0.25	0.22	0
Ova	755.56	81.25	6.92	0.77	512	61.54	3.83	900	88.57	3.82	203.08	6.57	6	133.33	9.67	4	9	1.45	139.29	1.59	2	545.71	34.67	5	384	8.53	5.1	419.61	21.33	7.8	350	24	4.9	403.64	148.57	5.79	0.92	264.15	17.04	4.95	230.33	22.33	9.11
Larvae gen.sp.	0.22	0.47	0	0	0	0.15	0	0	0.64	0	0	0.19	0	0.17	0.08	0	0	0	0	0	0	0	0.13	0	0	0.13	0	0	0	0	0	0.13	0	0	0.1	0	0	0	0.19	0	0	0	0
Fish ova	0	0.08	0.23	0.17	0	0	0	0	0	0	0	0	0	0	0	0	0	0	0	0	0	0	0	0	0	0	0	0	0	0	0	0	0	0	0	0	0	0	0	0	0.5	0.67	0.33
Fish larvae	0	0	0	0	0	0	0	0	0	0	0.08	0	0	0.17	0	0	0	0	0.18	0	0	0	0.07	0	0	0	0	0	0	0	0	0	0	0	0.67	0	0	0	0	0	0.17	0	0
SUM	3207.74	1276.82	123.24	13.24	2181.2	487.15	44.48	4239.2	1280.5	103.34	2547.24	221.11	85.83	3787.02	292.22	113.41	102	20.3	3234.31	21.26	86	2834.3	1179.07	146.38	2249.8	1170.42	67.5	1533.15	1572.84	95.4	4761.4	1072.31	100.6	2092.53	1454.23	166.2	6.64	1778.07	351.05	292.36	1683.15	336.61	234.75

## Sheet: Biomass
Biomass (ind. m-3)
Species	2259 0-45	2259 45-173	2259 170-300	2259 297-1000	2261 0-50	2261 50-180	2261 180-300	2263 0-50	2263 50-190	2263 190-300	2264 0-130	2264 130-235	2264 235-300	2265 0-60	2265 60-180	2265 180-250	2265 250-300	2265 296-1000	2266 0-56	2266 55-200	2266 200-300	2267 0-70	2267 70-220	2267 220-300	2268 0-50	2268 50-200	2268 200-300	2269 0-51	2269 50-200	2269 200-300	2270 0-50	2270 50-200	2270 200-300	2271 0-55	2271 55-160	2271 160-300	2271 296-1000	2272 0-106	2272 110-218	2272 210-319	2275 0-120	2275 120-210	2275 210-300
Foraminifera	0.356	0.264	0.006	0.002	0.145	0.092	0.003	0.102	0.115	0.009	0.028	0.028	0.003	0.065	0.025	0.006	0.003	0.001	6.138	0.001	0.006	0	0	0	0	0	0	0	0.295	0.014	0.221	0.261	0.029	0.115	0.352	0.066	0.007	0.092	0.236	0.237	0.335	0.545	0.306
Radiolaria	0	0.001	0	0	0.023	0	0	0.041	0	0	0.017	0.006	0.001	0.031	0.009	0.002	0.002	0.001	0.04	0	0.005	0	0	0	0	0	0	0	0.059	0.004	0.031	0.042	0.003	0.029	0.026	0.005	0	0.017	0.016	0.016	0.027	0.009	0.012
Medusae	0.009	0	0	0	0.012	0.001	0	0.024	0.001	0.479	0.01	0	0	0.006	0.001	0	0	0	0.012	0	0	0.022	0	0	0.003	0.001	0.002	0.005	0.001	0	0.017	0	0	0.006	0.002	0	0	0	0	0	0.01	0	0
Tomopteris sp.	0.75	0	0	0	0	1.26	0	0	0	0	0	0	0	0	0	0	0	0	0	0	0	0	0	0	0	2.133	0	0	0	0	0	0	0	0	0	0	0	0	0	0	0.026	0.074	0
Polychaeta	0.249	0.061	0.007	0.005	0.459	0.043	0	0.344	0.405	0.004	0.556	0.003	0.008	0.942	0.004	0	0.006	0.003	0.866	0.001	0.004	0.963	0.532	0.009	0.605	0.1	0.005	0.013	0.104	0	2.224	0.037	0	0.352	0.109	0	0	0.251	0.03	0.022	0.11	0.036	0.001
Pteropoda	0.886	0	0	0	0.338	0	0	0.459	0	0	0.001	0	0	0.016	0	0	0	0	0.057	0	0	0.097	0.001	0	0.016	0	0	0.074	0.001	0	0.009	0.001	0	0.067	0.001	0	0	0.071	0	0	0	0	0
Gastropoda	0.089	0	0.003	0	0	0.003	0.002	0	0	0.003	0.031	0	0	0.008	0.023	0	0	0	0	0	0	0	0	0	0	0.006	0.026	0	0.027	0	0.007	0.003	0	0	0.017	0.01	0	0.026	0.005	0.012	0	0	0
Ostracoda	0	0.065	0.058	0.004	0	0.011	0.048	0.007	0.038	0.058	0.106	0.016	0.099	0.052	0.07	0.055	0.083	0.052	0.024	0	0.048	0.013	0.295	0.071	0.001	0.164	0.054	0.01	0.088	0.037	0.057	0.203	0.106	0.077	0.076	0.131	0.027	0.029	0.097	0.169	0.105	0.035	0.033
Harpactikoida	0	0	0	0	0	0	0	0	0	0.001	0.001	0	0	0.002	0	0	0.001	0	0	0.001	0	0	0	0	0	0	0	0	0	0	0	0	0	0	0	0	0	0	0	0.001	0	0	0
Aetideidae gen.sp. 1	0	0	0	0	0	0	0	0	0	0	0	0	0.009	0	0	0	0	0	0	0	0	0	0	0	0	0	0	0	0	0	0	0	0	0	0	0	0	0	0	0	0	0	0.002
Aetideidae gen.sp. 2	0	0	0	0	0	0	0	0	0	0	0	0	0	0	0	0	0	0	0	0	0	0	0	0	0	0.038	0	0	0	0	0	0.036	0	0	0	0	0	0	0.029	0	0	0	0
Aetideidae gen.sp. 3	0	0	0.009	0.007	0	0	0	0	0	0	0	0	0	0	0	0	0.091	0.007	0	0	0	0	0.038	0	0	0	0	0	0	0.065	0	0.063	0	0	0.083	0	0.001	0	0	0	0	0	0
Aetideidae gen.sp. 4	0	0	0	0	0	0	0	0	0	0	0	0	0	0	0	0	0	0.01	0	0	0	0	0.05	0	0	0	0	0	0	0	0	0.049	0	0	0.074	0	0	0	0	0	0	0	0
Aetideidae gen.sp. F	0	0	0	0	0	0	0	0	0	0	0	0	0	0	0	0	0	0	0	0	0.097	0	0	0	0	0	0	0	0	0	0	0	0	0	0	0	0	0	0	0	0	0	0
Aetideus armatus F	0	0	0	0	0	0	0	0	0	0.024	0.05	0.03	0	0	0.103	0	0.112	0.004	0	0	0	0	0.121	0	0.058	0.093	0	0	0.117	0	0	0.12	0	0	0.182	0.059	0	0	0.295	0	0.024	0	0
Aetideus armatus M	0	0	0	0	0	0	0.009	0	0	0	0	0	0	0	0	0	0	0	0	0	0	0	0.032	0	0	0.02	0.012	0	0.022	0	0	0.075	0	0	0	0.079	0	0	0.029	0.096	0	0	0.018
Aetideus sp. 1-5	0	0.013	0.014	0	0	0.016	0.034	0	0.032	0.11	0.02	0.011	0	0	0.042	0.092	0.026	0	0	0	0	0	0.111	0	0	0.067	0.016	0	0.213	0	0	0.052	0	0	0.222	0	0.001	0	0.01	0.04	0	0.048	0.04
Amallothrix dentipes 1-5	0	0	0	0.004	0	0	0	0	0	0	0	0	0	0	0	0	0.023	0.028	0	0	0	0	0	0.036	0	0	0.011	0	0	0	0	0	0.008	0	0	0.022	0.002	0	0	0	0	0	0
Amallothrix dentipes F	0	0	0.009	0.004	0	0	0	0	0	0	0	0	0	0	0	0	0	0.014	0	0	0.03	0	0.051	0.094	0	0.017	0	0	0	0.054	0	0	0.029	0	0	0.096	0	0	0	0	0	0	0.051
Amallothrix dentipes M	0	0	0	0.002	0	0	0	0	0	0	0	0	0	0	0	0	0	0	0	0	0	0	0	0	0	0	0	0	0	0	0	0	0	0	0	0	0	0	0	0	0	0	0
Calanidae gen.sp.1 1-3	0	0	0	0	0	0.001	0	0	0	0.004	0	0	0	0	0	0	0	0	0	0	0	0	0	0.014	0	0	0	0	0	0.001	0	0	0	0	0	0	0	0	0	0	0	0	0
Calanidae gen.sp.1 4-5	0	0	0.01	0.002	0	0	0	0	0	0	0	0	0	0	0	0	0	0	0	0	0	0	0	0	0	0	0	0	0	0	0	0	0.024	0	0	0	0	0	0	0.004	0	0	0
Calanidae gen.sp.2 1-5	0	0	0.003	0.007	0	0	0	0	0	0	0	0	0	0	0	0	0	0.004	0	0	0.008	0	0	0.01	0	0	0	0	0	0	0	0	0	0	0	0	0	0	0	0	0	0.004	0
Calanidae gen.sp.2 F	0	0	0	0.001	0	0	0	0	0	0	0	0	0	0	0	0	0	0.002	0	0	0	0	0	0	0	0	0	0	0	0	0	0	0	0	0	0	0	0	0	0	0	0	0
Calanoides acutus 1	0.01	0.002	0	0	0	0.001	0	0.01	0.004	0	0.018	0	0	0.051	0	0	0	0	0.07	0	0	0.105	0	0	0.064	0	0	0.061	0.007	0	0.16	0.004	0	0.027	0.023	0	0	0.06	0.002	0	0.021	0	0
Calanoides acutus 2	0	0	0	0	0	0	0	0	0	0	0.006	0	0	0.014	0	0	0	0	0.026	0	0	0	0	0	0.015	0	0	0	0.01	0	0.19	0.007	0	0.017	0.013	0	0	0.025	0	0	0.005	0	0
Calanoides acutus 3	0	0.042	0	0	0	0.012	0	0	0.02	0	0.012	0	0	0	0	0	0	0	0	0	0	0	0	0	0	0	0	0	0.013	0	0	0	0	0	0	0	0	0.035	0	0	0	0	0
Calanoides acutus 4	0	1.446	0.044	0	0.223	1.29	0	0	3.705	0	1.486	0.116	0	0.124	0.103	0	0	0.018	0.478	0	0	0.381	0.236	0	0	1.037	0	0	0.119	0	0	0.367	0	0.136	0.563	0	0	0	0	0	0	0	0
Calanoides acutus 5	4.75	5.097	0	0	1.918	13.854	0	3.522	22.073	0.11	10.098	0.116	0	1.544	1.636	2.41	0	0.103	0.989	0	0	1.658	4.057	0.298	0.257	4.79	0.587	1.031	1.65	0.243	1.475	3.568	0	0.389	2.483	0.194	0	1.38	0.198	0	0	0	0.172
Calanoides acutus F	2.08	0.483	0	0	3.448	2.472	0	2.138	8.067	0	3.524	0	0	4.226	0.77	0	0	0	1.446	0.121	0	2.106	0.647	0	2.91	1.502	0.461	2.29	0.531	0	1.898	0.291	0	4.124	1.321	0	0	2.098	0.22	0	0.38	0	0
Calanoides acutus M	0	0	0	0.012	0	0	0	0	0	0	0	0	0	0	0	0	0	0	0	0	0	0	0	0	0	0	0	0	0	0	0	0	0	0	0	0	0	0	0	0	0	0	0
Calanus simillimus 1	0	0	0	0	0	0	0	0	0	0	0.031	0	0	0.023	0	0	0	0	0.103	0	0	0.098	0.009	0	0.089	0	0	0.072	0.02	0	0.165	0.003	0	0.135	0.075	0.001	0	0.109	0	0	0.014	0.004	0.002
Calanus simillimus 2	0	0	0	0	0	0	0	0	0.003	0	0.07	0	0	0.075	0	0	0	0	0.251	0	0	0.252	0	0.005	0.252	0	0	0.215	0.014	0	0.259	0.008	0	0.183	0.08	0	0	0.249	0	0	0.041	0	0
Calanus simillimus 3	0	0	0	0	0	0	0	0	0	0	0.091	0	0	0.092	0	0	0	0	0.168	0	0	0.176	0.04	0	0.498	0.008	0	0.15	0.042	0	0.484	0.009	0	0.162	0.124	0	0	0.256	0.01	0	0.071	0	0
Calanus simillimus 4	0	0.054	0	0	0	0.032	0	0	0.085	0	0.05	0	0	0.18	0.022	0	0	0	0.255	0	0	0.159	0.016	0	0.264	0.08	0	0.098	0.071	0	0.351	0.069	0	0.181	0.088	0	0	0.165	0.026	0	0.165	0.029	0
Calanus simillimus 5	0.187	0.388	0.264	0	0.227	0.644	0.213	0.106	0.496	0.176	0.282	0.053	0	0.085	0.04	0	0.241	0.009	0.091	0	0	0.62	0.031	0.062	0.453	0.346	0	0.103	0.159	0.051	0.474	0.38	0	0.104	0.492	0	0	0.206	0.108	0	0.106	0.045	0
Calanus simillimus F	0.546	0.769	0.156	0	0.609	0.699	0	0.45	3.032	0.07	5.49	0	0.107	9.12	0.6	0.15	0	0.012	18.14	0	0.074	8.12	2.475	0.101	14.949	2.205	0.081	15.665	2.016	0.141	15.299	1.699	0	20.915	6.646	0.125	0	13.284	1.182	0.075	1.511	0.103	0.103
Calanus simillimus M	0.173	0.432	0.045	0.061	0	0.108	0	0	0.929	0.049	2.579	0	0	3.076	0.641	0	0	0.083	0.556	0	0	1.484	2.163	0.174	7.753	0.976	0.062	1.407	1.804	0.256	1.037	1.102	0	2.272	2.737	0	0.021	0.753	1.214	0.076	0.074	0	0
Calanus propinquus 1	0.007	0.001	0	0	0	0	0	0	0	0	0	0	0	0	0	0	0	0	0	0	0	0	0	0	0	0	0	0	0.001	0	0	0	0	0	0	0	0	0	0	0	0	0	0
Calanus propinquus 2	0	0.005	0	0	0	0	0	0	0	0	0	0	0	0	0	0	0	0	0	0	0	0	0.004	0	0	0	0	0	0	0	0	0	0	0	0	0	0	0	0	0	0	0	0
Calanus propinquus 3	0	0	0	0	0	0	0	0	0	0	0.009	0	0	0	0	0	0	0	0	0	0	0	0	0	0.025	0	0	0	0	0	0	0	0	0	0	0	0	0	0	0	0	0	0
Calanus propinquus F	0	0	0	0	0	0.21	0	0	0	0	0	0	0	0	0	0	0	0	0	0	0	0	0	0	0	0	0.273	0	0	0	0	0	0	0	0	0	0	0	0	0	0	0	0
Calanus sp.1 1	0	0	0	0	0	0	0	0.007	0.002	0	0	0	0	0	0	0	0	0	0	0	0	0	0	0	0	0	0	0	0	0	0	0	0	0	0	0	0	0	0	0	0	0	0
Calanus sp.1 2	0	0	0	0	0.009	0	0	0	0.003	0	0	0	0	0	0	0	0		0	0	0	0	0	0	0	0	0	0	0	0	0	0	0	0	0	0	0	0	0	0	0	0	0
Calanus sp.2 1	0	0	0	0	0	0	0	0	0	0	0	0	0	0	0	0	0	0	0	0	0	0	0	0	0	0	0	0	0	0	0	0	0	0	0	0	0	0	0	0	0	0	0.001
Calanus sp.2 2	0	0	0	0	0	0	0	0	0	0	0	0	0	0	0	0	0	0	0	0	0	0	0	0	0	0	0	0	0	0	0	0	0	0	0	0	0	0	0	0	0	0	0.001
Candacia simplex F	0	0	0	0	0	0	0	0	0	0	0	0	0	0	0	0	0	0	0	0	0	0	0	0	0	0	0	0	0	0	0	0	0.09	0	0	0	0	0	0	0	0	0	0
Candacia sp. 1-5	0	0	0.043	0	0	0	0	0	0.114	0	0.074	0	0	0	0	0	0	0	0	0	0	0	0.081	0	0	0.129	0	0	0.001	0	0.009	0	0.16	0	0	0	0	0.001	0	0.174	0	0	0
Clausocalanus laticeps F	0	0	0	0	0	0	0	0	0.041	0	1.331	0.013	0	2.528	0.063	0.053	0.085	0.02	0.467	0.006	0.085	0.734	1.244	0.042	0.073	2.742	0.075	0.06	1.021	0.074	2.84	0.254	0.065	0.992	0.42	0.03	0.003	0.481	0.162	0.041	0.033	0	0.017
Clausocalanus laticeps M	0	0	0	0	0	0	0	0	0.002	0.004	0.115	0.017	0.041	0.015	0.057	0.009	0.02	0	0	0	0.019	0	0.054	0.047	0	0.092	0	0	0.113	0.01	0.139	0.051	0	0.017	0.091	0.038	0	0.009	0.021	0.03	0.002	0	0.003
Clausocalanus sp. F	0	0	0	0	0	0	0	0	0	0	0	0	0	0	0	0	0	0	0	0	0	0	0	0	0	0.01	0	0	0	0	0	0	0	0	0	0	0	0	0	0	0	0	0
Clausocalanus sp. M	0	0	0	0	0	0	0	0	0	0	0	0	0	0	0	0	0	0	0	0	0	0	0	0	0	0.006	0	0	0	0	0	0	0	0	0	0	0	0	0	0	0	0	0
Clausoicalanus brevipes F	0	0	0	0	0	0	0	0	0	0	0.029	0.009	0	0.07	0.045	0.008	0	0	0	0	0	0	0.099	0.011	0	0.037	0.007	0	0.057	0.024	0.015	0.064	0	0.035	0.037	0.033	0	0	0.008	0.03	0.047	0.081	0.046
Clausoicalanus brevipes M	0	0	0	0	0	0	0	0	0	0	0	0	0	0	0	0	0	0	0	0	0	0	0.004	0	0	0	0	0	0	0	0	0.007	0	0	0	0	0	0	0	0	0	0	0.076
Ctenocalanus sp. F	3.422	0.694	0.014	0	1.206	0.474	0.004	0.303	2.603	0.025	2.746	0.04	0.02	5.074	0.149	0.056	0.027	0.005	1.601	0	0.026	2.423	1.737	0.024	0.197	2.916	0.028	0.047	2.427	0.017	6.828	0.434	0.016	1.263	1.026	0.014	0	1.505	0.059	0.028	0.505	0.043	0.018
Ctenocalanus sp. M	0	0.049	0.002	0.001	0	0.023	0	0	0.055	0	0.04	0.007	0	0.009	0.039	0.022	0.014	0.004	0	0	0.041	0	0.089	0.065	0	0.09	0.006	0	0.063	0.006	0	0.107	0	0	0.125	0.006	0	0.013	0.013	0.055	0	0	0.062
Ctenocalanus/Clausocalanus 1-5	0.596	0.628	24.512	0	0.734	0.337	0.009	0.377	1.5	0.039	3.308	0.065	0.039	6.648	0.416	0.048	0.054	0.014	3.413	0.011	0.05	10.694	7.206	0.174	0.981	5.295	0.167	0.237	2.454	0.006	12.026	2.45	0.045	3.529	2.329	0.04	0.001	3.168	0.112	0.074	1.613	0.242	0.079
Euchirella similis 1-5	0	0	0	0	0	0	0	0	0	0	0	0	0	0	0	0	0	0	0	0	0	0	0	0	0	0	0.316	0	0	0	0	0	0	0	0	0	0	0	0	0	0	0	0
Gaetanus sp. 1-5	0	0	0	0.011	0	0	0	0	0	0	0	0	0	0	0	0	0	0.005	0	0	0	0	0	0	0	0	0	0	0	0	0	0	0	0	0	0	0	0	0	0	0	0	0
Gaetanus tenuispinus F	0	0	0	0	0	0	0	0	0	0	0	0	0	0	0	0	0	0.021	0	0	0	0	0	0	0	0	0	0	0	0	0	0	0	0	0	0.037	0.007	0	0	0.047	0	0	0
Gaetanus tenuispinus M	0	0	0	0.015	0	0	0	0	0	0	0	0	0	0	0	0	0	0	0	0	0	0	0	0	0	0	0	0	0	0	0	0	0	0	0	0	0.006	0	0	0	0	0	0
Haloptilus oxycephalus	0.062	0.081	0	0	0	0.102	0	0.115	0.246	0	0.378	0.053	0	0.138	0	0	0	0	0.037	0	0	0.056	0.07	0	0.283	0.047	0	0.026	0.154	0	0.052	0.146	0	0.529	0.025	0	0	0.143	0.015	0	0.105	0	0
Heterorabdidae gen.sp. 1-5	0.006	0.007	0.852	0.028	0	0.006	0.056	0	0.009	0.079	0.004	0.091	0.058	0.002	0.018	0.043	0.028	0.025	0	0	0.096	0	0.005	0.042	0	0.006	0.078	0	0.022	0.035	0	0.037	0.048	0	0.019	0.042	0.001	0	0.005	0.057	0	0.004	0.018
Heterorabdus austrinus F	0	0	0.099	0	0	0.137	0	0	0	0	0	0	0	0	0.083	0	0	0.03	0	0	0	0	0.064	0	0	0.07	0	0	0	0	0	0	0	0	0.105	0	0.011	0	0	0	0	0	0
Heterorabdus austrinus M	0	0	0	0.017	0	0	0	0	0	0	0	0	0	0	0	0	0	0.006	0	0	0.026	0	0	0	0	0	0	0	0	0.024	0	0	0	0	0	0	0.006	0	0	0	0	0	0
Lucicutia sp. 1-5	0	0	0	0.006	0	0	0	0	0	0	0	0	0	0	0	0	0	0.007	0	0	0	0	0	0	0	0	0	0	0	0	0	0	0	0	0	0	0.001	0	0	0	0	0	0
Lucicutia sp. F	0	0	0	0.011	0	0	0	0	0	0	0	0	0	0	0	0	0	0.007	0	0	0	0	0	0	0	0	0	0	0	0	0	0	0	0	0	0	0	0	0	0	0	0	0
Lucicutia sp. M	0	0	0	0	0	0	0	0	0	0	0	0	0	0	0	0	0	0	0	0	0	0	0	0	0	0	0	0	0	0	0	0	0	0	0	0	0	0	0	0	0	0	0
Metridia sp. 1-3	0	0	0	0	0	0	0	0	0	0	0	0	0	0	0	0	0	0	0	0	0	0	0	0	0	0	0	0	0	0	0	0	0	0	0	0.02	0	0	0	0.001	0	0	0.003
Metridia curticauda 1-5	0	0	0	0.015	0	0	0	0	0	0	0	0	0	0	0	0	0	0.018	0	0	0	0	0	0	0	0	0	0	0	0	0	0	0	0	0	0	0.003	0	0	0.008	0	0	0
Metridia curticauda F	0	0	0	0.016	0	0	0	0	0	0	0	0	0	0	0	0	0	0.042	0	0	0	0	0	0	0	0	0	0	0	0	0	0	0	0	0	0	0.017	0	0	0	0	0	0
Metridia curticauda M	0	0	0	0.008	0	0	0	0	0	0	0	0	0	0	0	0	0	0.006	0	0	0	0	0	0	0	0	0	0	0	0	0	0	0	0	0	0	0.008	0	0	0	0	0	0
Metridia gerlachei 1-5	0	0.01	0	0	0	0	0	0	0	0	0	0	0	0	0	0	0	0	0	0	0	0	0	0	0	0	0	0	0	0	0	0	0	0	0	0	0	0	0	0	0	0	0
Metridia gerlachei F	0.087	0.027	0	0.004	0	0	0	0	0	0	0	0	0	0	0	0	0	0	0	0	0	0	0	0	0	0	0	0	0	0	0	0	0	0	0	0	0	0	0	0	0	0	0
Metridia gerlachei M	0	0	0	0.002	0	0	0	0	0	0	0	0	0	0	0	0	0	0	0	0	0	0	0	0	0	0	0	0	0	0	0	0	0	0	0	0	0	0	0	0	0	0	0
Metridia lucens 1	0.002	0.044	0.023	0	0	0.006	0.002	0	0.041	0.012	0	0.03	0.003	0	0.008	0.026	0.005	0	0	0.001	0.003	0	0.023	0.005	0	0.016	0.002	0.004	0.014	0.004	0	0.033	0.008	0	0.006	0.017	0	0	0.009	0.019	0.01	0.034	0.003
Metridia lucens 2	0	0.011	0.003	0	0	0.003	0.003	0	0.033	0.002	0.001	0.016	0	0	0.013	0.02	0.003	0	0	0	0.003	0	0.005	0.01	0	0.017	0.003	0.003	0.024	0.006	0	0.023	0	0	0.01	0.025	0	0	0.008	0.043	0.006	0.062	0.009
Metridia lucens 3	0	0.022	0.008	0.001	0	0.004	0.002	0	0.04	0.007	0	0.01	0	0	0.019	0.018	0	0.001	0	0	0.008	0	0.008	0.005	0.006	0.019	0.007	0	0.013	0.01	0	0.015	0.012	0	0.008	0.023	0	0	0.004	0.04	0	0.02	0.023
Metridia lucens 4	0.015	0.071	0.005	0.004	0.015	0.007	0	0	0	0.005	0.008	0.006	0	0	0.025	0	0.025	0	0	0	0.022	0	0.006	0.008	0	0.013	0	0	0.005	0.022	0	0.012	0	0	0.007	0.02	0	0	0	0.008	0	0.01	0.021
Metridia lucens 5	0	0.097	0.018	0.002	0	0.032	0.016	0.033	0	0.016	0.042	0	0	0	0	0	0	0.002	0	0	0.023	0	0.022	0.049	0	0	0	0	0	0.026	0	0	0	0	0.02	0	0	0	0	0.061	0	0	0.07
Metridia lucens F	0.758	0.522	0	0.004	0	0.036	0.251	0	0.165	0.1	0.43	0.393	0.313	0.584	1.662	0	0	0.011	0	0.075	0.998	0	0.441	0.408	0	0.724	0.058	0	0.058	0.682	0	1.236	1.146	2.771	1.171	0	0	0.031	0.226	0.601	0	0	0.168
Metridia lucens M	0	0	0	0.002	0	0	0	0	0	0.021	0.01	0.012	0.019	0	0.012	0.015	0	0.011	0	0	0	0	0.017	0.014	0	0.023	0	0	0.027	0.011	0	0.01	0.013	0	0.043	0.029	0	0	0.023	0.065	0	0	0
Microcalanus pygmaeus 1-5	0	0.024	0.079	0.005	0.001	0.005	0.022	0	0.014	0.084	0.001	0.006	0.034	0	0.002	0.003	0.067	0.002	0	0.001	0.044	0	0	0.227	0	0.011	0.004	0	0	0.065	0	0.008	0.045	0	0	0.034	0.001	0	0.003	0.11	0.001	0.022	0.048
Microcalanus pygmaeus F	0.013	0.084	0.033	0.003	0.002	0.012	0.009	0.002	0.075	0.007	0.002	0.022	0.015	0	0.004	0.194	0.017	0.007	0	0.001	0.029	0.002	0.028	0.299	0	0.094	0.007	0	0	0.028	0	0.015	0.031	0	0.003	0.034	0.001	0	0.006	0.074	0	0	0
Microcalanus pygmaeus M	0	0.001	0.006	0	0	0.003	0.009	0	0	0.006	0	0.003	0.003	0	0	0	0.004	0	0	0	0	0	0	0.012	0	0	0.006	0	0	0.003	0	0	0	0	0	0	0	0	0	0.002	0	0	0
Microcalanus nauplii	0	0	0	0	0	0	0	0	0	0	0	0	0	0.001	0	0	0	0	0	0	0	0.001	0	0	0	0	0	0.001	0	0	0	0	0	0	0	0	0	0	0	0	0	0	0
Mormonilla sp.	0	0	0	0	0	0	0	0	0	0	0	0	0	0	0	0	0	0.001	0	0	0	0	0	0	0	0	0	0	0	0	0	0	0	0	0	0	0	0	0	0	0	0	0
Neocalanus tonsus F	0	0	0	0	0	0	0	0	0	0	0	0	0	0	0	0	0	0	0	0	0	0	0	0	0	0	0	0	0	0	0	0.06	0	0	0	0	0	0	0	0	0	0	0
Oithona frigida	0.011	0.227	0.087	0.009	0	0.029	0.048	0.003	0.234	0.252	0.353	0.323	0.039	0	0.328	0.219	0.028	0.013	0	0.002	0.038	0	0.86	0.076	0.013	1.336	0.074	0.028	0.627	0.098	0	0.637	0.031	0.005	0.418	0.161	0.001	0	0.199	0.155	0.032	0.089	0.008
Oithona sp. <1 mm 1-5	4.035	2.045	0.158	0.004	1.849	0.439	0.036	5.72	1.306	0.077	4.654	0.117	0.059	7.001	0.247	0.057	0.039	0.005	7.523	0.018	0.025	5.233	2.39	0.074	5.787	1.467	0.108	2.845	2.184	0.049	7.683	1.324	0.036	1.626	1.851	0.037	0.001	3.063	0.279	0.16	2.47	0.122	0.051
Oncaea sp.	0.021	0.526	0.013	0.01	0.002	0.103	0.02	0.003	0.205	0.02	0.213	0.024	0.048	0.016	0.118	0.053	0.035	0.016	0	0.005	0.039	0.001	0.146	0.065	0.006	0.274	0.01	0.008	0.097	0.042	0.001	0.096	0.03	0.003	0.116	0.08	0.001	0.002	0.084	0.058	0.001	0.011	0.056
Pareuchaeta spp. 1	0.022	0.105	0.04	0	0	0.046	0.013	0.022	0.1	0.079	0.004	0.072	0.06	0	0.059	0.082	0.018	0.001	0.006	0	0.031	0.005	0.113	0.018	0	0.107	0.082	0	0.046	0.033	0	0.037	0.033	0	0	0.047	0.001	0	0.016	0.053	0	0.004	0.049
Pareuchaeta spp. 2	0.074	0.402	0.043	0	0	0.217	0.047	0	1.041	0.131	0.864	0.142	0.027	0.191	0.584	0.285	0.026	0.006	0.041	0	0.034	0.098	0.577	0.02	0	0.984	0.029	0.088	0.423	0.048	0	0.487	0.025	0	0.493	0.257	0	0.074	0.259	0.153	0	0.021	0.012
Pareuchaeta spp. 3	0	0.053	0.03	0	0	0.076	0	0	0.133	0.425	2.718	0.088	0.052	0.456	0.96	0.539	0.649	0.062	0	0.024	0.188	0.271	2.312	0	0.203	2.179	0.044	0.101	1.258	0	0	0.939	0.068	0.484	2.618	0.26	0.007	0.224	0.508	0.279	0	0.074	0.095
Pareuchaeta spp. 4	0	0	0	0.012	0	0	0	0	0	0	0.153	0	0	0	0.33	0	0	0.03	0	0	0.42	0	0.857	0.224	0	0	0.096	0	0.133	0.199	0	0.559	0	0.46	0.862	0	0.007	0	0.107	0.263	0	0	0
Pareuchaeta spp. 5	0	0	0.074	0.058	0	0	0	0	0	0	0	0	0	0	0	0	0	0.05	0	0	0.096	0	0	0	0	0	0	0	0	0	0	0	0.096	0	0	0.069	0.007	0	0	0.164	0	0	0
Pareuchaeta spp. F	0	0	0	0.086	0	0	0	0	0	0	0	0	0	0	0	0	0	0.05	0	0	0	0	0	0	0	0	0	0	0	0	0	0.147	0	0	0	0.201	0.017	0	0.089	0	0	0	0
Pareuchaeta spp. M	0	0	0	0.011	0	0	0	0	0	0	0	0	0	0	0	0	0	0	0	0	0	0	0	0	0	0	0	0	0	0	0	0	0	0	0	0	0.011	0	0	0	0	0	0
Pleuromamma robusta 1-5	0	0	0.001	0.001	0	0	0	0	0	0.001	0	0	0.002	0	0.001	0.029	0.006	0.004	0	0	0.006	0	0	0.003	0	0.003	0	0	0	0.004	0	0.004	0.014	0	0.004	0.024	0.002	0	0	0.003	0	0.001	0.006
Pleuromamma robusta F	0	0	0	0	0	0	0	0	0	0	0	0	0	0	0.214	0	0	0.004	0	0	0	0	0	0	0	0	0	0	0	0	0	0	0.081	0	0.956	0.254	0.005	0	0	0	0	0	0
Pleuromamma robusta M	0	0	0	0.002	0	0	0	0	0	0	0	0	0	0	0.011	0	0	0.011	0	0	0	0	0	0	0	0	0	0	0	0	0	0	0.029	0	0.013	0.011	0.006	0	0	0	0	0	0
Rhincalanus gigas 2	0	0.08	0	0	0	0.056	0	0	0.18	0	0.14	0.016	0	0	0.049	0	0	0	0	0	0	0	0.076	0	0	0.356	0.012	0	0.019	0	0	0.026	0	0	0.074	0	0	0	0.008	0	0	0	0
Rhincalanus gigas 3	0.076	0.184	0	0	0	0.078	0	0	0.267	0	0.694	0.108	0	0	0.335	0.238	0.203	0	0	0	0.033	0.055	1.183	0	0	1.033	0.079	0.135	0.69	0	0	0.414	0	0	0.395	0	0	0.029	0.069	0	0.03	0	0
Rhincalanus gigas 4	0.505	2.12	0	0	0	1.093	0	0	3.161	0	0.47	0.146	0	0	0.619	0.721	0	0.012	0.399	0	0	0.345	1.366	0	0	1.446	0.232	0.21	1.494	0	0	1.241	0	0	1.236	0.067	0	0.287	0.189	0	0.078	0.103	0
Rhincalanus gigas 5	0	9.752	0.137	0	0	10.088	0	0	17.119	0	7.84	0	0.857	2.64	1.762	1.444	1.45	0.12	4.442	0	0.441	4.946	5.119	0.181	1.407	6.809	1.215	0.424	3.924	0.472	3.405	3.944	0	1.148	3.756	0.306	0.067	2.089	3.008	0	0.551	0.228	0
Rhincalanus gigas F	2.656	4.881	0	0	4.096	8.992	0	3.105	29.239	0	13.93	0	0	7.255	4.483	0.628	0.691	0.325	1.738	0	0.391	7.196	8.533	0	2.366	16.031	1.759	14.703	3.347	0.238	18.996	2.236	0.399	4.134	4.943	0	0	12.909	1.481	0	7.895	0	0
Rhincalanus gigas M	0	0	0	0.054	0	0.358	0.22	0	0.687	0	0.156	0	0	0	0	0	0	0.103	0	0	0.232	0	0.732	0.208	0	0	0	0	0	0.407	0.407	0.636	0.407	0.423	0.387	0.166	0	0.63	0.188	0.213	0.179	0	0
Rhincalanus nasutus 1-5	0	0	0	0	0	0	0	0	0	0	0	0	0	0	0	0	0	0	0	0	0	0	0	0	0	0	0	0	0	0	0	0	0	0	0	0	0	0	0	0	0.037	0	0
Rhincalanus sp. nauplii	0.006	0.002	0	0	0.003	0	0	0.016	0.003	0	0.003	0	0	0.002	0	0	0	0	0	0	0	0	0	0	0.002	0	0	0.004	0	0	0	0	0	0.003	0	0	0	0	0	0	0.02	0.001	0.001
Scaphocalanus sp. 1-5	0	0	0.126	0.02	0	0	0.012	0	0	0	0	0	0	0	0	0	0.199	0.029	0	0	0	0	0.033	0	0	0	0	0	0	0	0	0	0	0	0	0	0	0	0	0	0	0	0
Scaphocalanus sp. F	0	0	0.046	0.01	0	0	0.07	0	0	0	0	0	0	0	0	0	0	0.016	0	0	0	0	0	0	0	0	0	0	0	0	0	0	0	0	0	0	0	0	0	0	0	0	0.031
Scolecithricella minor 1-5	0	0.085	0.039	0.001	0	0.028	0.022	0	0.188	0.046	0.274	0.018	0.068	0.066	0.098	0.03	0.033	0.006	0.009	0	0.046	0	0.34	0.198	0.005	0.364	0.006	0	0.117	0.059	0	0.286	0.039	0.007	0.076	0.044	0.001	0	0.052	0.05	0.021	0.022	0.046
Scolecithricella minor F	0.018	0.024	0	0	0	0.023	0	0	0.019	0	0.239	0.039	0.055	0.196	0.113	0.031	0.025	0	0	0	0.035	0	0.257	0.018	0.016	0.315	0.013	0	0.233	0.038	0.065	0.211	0	0.041	0.352	0.054	0	0.015	0.093	0.057	0.03	0.031	0.051
Scolecithricella minor M	0	0.005	0	0.001	0	0	0	0	0	0.005	0.057	0	0	0.009	0.019	0.008	0	0.002	0	0	0.006	0	0.024	0.006	0	0.06	0	0	0.068	0.021	0	0.06	0	0	0.069	0.004	0	0.01	0.021	0.005	0	0.01	0.006
Subeucalanus longiceps 1-5	0	0.074	0	0.022	0	0.04	0	0	0	0	0.032	0	0	0	0.136	0.093	0.13	0.029	0.143	0	0	0.054	0.044	0	0	0	0	0	0.035	0	0	0	0	0	0.512	0.029	0	0.263	0.184	0	0.018	0	0
Subeucalanus longiceps F	0	0	0	0	0	0	0	0	0	0	0.095	0	0	0	0	0	0	0.011	0.688	0	0	0.291	0.244	0	0	0.098	0	0.176	0.29	0	0.344	0.32	0	0.795	0.31	0	0	0.435	0.107	0	2.877	0.126	0
Subeucalanus longiceps M	0	0	0	0	0	0	0	0	0	0	0.11	0	0	0	0	0	0	0.009	0	0	0	0	0	0	0	0	0	0	0.019	0	0	0.025	0	0	0.067	0	0	0	0	0	0	0	0
Calanidae gen.sp.1 1-3	0	0	0	0	0	0.001	0	0	0	0.004	0	0	0	0	0	0	0	0	0	0	0	0	0	0.014	0	0	0	0	0	0.001	0	0	0	0	0	0	0	0	0	0	0	0	0
Calanidae gen.sp.1 4-5	0	0	0.01	0.002	0	0	0	0	0	0	0	0	0	0	0	0	0	0	0	0	0	0	0	0	0	0	0	0	0	0	0	0	0.024	0	0	0	0	0	0	0.004	0	0	0
Calanidae gen.sp.2 1-5	0	0	0.003	0.007	0	0	0	0	0	0	0	0	0	0	0	0	0	0.004	0	0	0.008	0	0	0.01	0	0	0	0	0	0	0	0	0	0	0	0	0	0	0	0	0	0.004	0
Calanidae gen.sp.2 F	0	0	0	0.001	0	0	0	0	0	0	0	0	0	0	0	0	0	0.002	0	0	0	0	0	0	0	0	0	0	0	0	0	0	0	0	0	0	0	0	0	0	0	0	0
Copepoda nauplii	0.123	0.012	0.003	0	0.058	0.001	0.001	0.151	0.008	0.002	0.035	0.001	0.001	0.087	0	0.001	0.003	0	0.09	0.001	0	0.112	0.004	0.002	0.071	0.001	0.001	0.042	0.016	0.001	0.195	0.003	0.001	0.1	0.007	0	0	0.05	0.001	0	0.009	0.001	0.002
Cyrripedia larvae	0	0	0	0	0	0	0	0	0	0.057	0	0	0	0	0	0	0	0	0	0	0	0	0.021	0.078	0	0	0	0	0	0	0	0.042	0	0	0	0	0	0	0	0	0	0	0
Decapoda larvae	0	0	0	0	0	0	0	0	0	0	0	0	0	0	0	0	0	0	0	0	0	0	0	0	0	0	0	0	0	0	0	0	0	0	0	0	0	0	0	0	0.169	0	0
Amphipoda	0	0	0	0.526	0.016	0.015	0.016	0.04	0.097	0	0.206	0	0	0.59	0	0	0	0.131	1.427	0	0	0.776	0.023	0	0	0	0	0.907	0.013	0	0.288	0	0.002	1.249	0.071	0.113	0	0.172	0	0	0.086	0	0.316
Thysanoessa sp.	15.556	0	28.858	7.966	0	0	0	0	0	0	0	0	0	0	5.833	0	39.867	0	0	0	0	0	0	0	0	0	0	0	0	0	1802.14	0	0	0	34.661	40	0	0	0	0	0	0	0
Euphausiidae nauplii	0	0	0	0	0	0	0	0	0	0.001	0	0	0	0	0	0	0.001	0	0	0	0	0	0	0	0	0	0	0	0	0	0	0	0	0	0	0	0	0	0	0	0.002	0	0.001
Euphausiidae larvae	0.491	0.182	0.007	0	0.599	0.051	0.007	0.043	1.631	0.009	3.057	0.017	0.01	3.908	0.024	0.016	0	0.019	1.653	0.005	0	1.678	0.907	0.016	0.201	0.345	0.215	0.094	0.615	0.005	0.695	0.137	0.008	1.775	0.345	0.003	0	0.716	0.047	0	0.475	0	0.001
Decapoda larvae	0	0	0	0	0	0	0	0	0	0	0	0	0	0	0	0	0	0	0	0	0	0	0	0	0	0	0	0	0	0	0	0	0	0	0	0	0	0	0	0	0.169	0	0
Chaetognatha	0.02	2.814	0.686	0.579	0.003	0	0.03	0.015	4.582	0.064	0.745	0.418	0.592	0.5	0.054	0.249	0.405	1.726	4.962	0.149	1.281	0.093	3.806	0.899	0.021	1.773	0.307	0.011	6.221	0.786	0.292	2.162	1.012	0.71	9.207	0.564	0.483	0.466	1.336	1.898	2.975	1.463	0.174
Appendicularia	2.026	0.12	0.001	0	0.279	0.083	0.001	0.544	0.224	0.009	0.171	0.001	0	0.215	0.005	0.003	0.002	0	0.127	0	0	0.149	0.025	0.002	0.034	0.009	0.002	0.043	0.012	0	0.527	0.007	0	0.084	0.063	0	0	0.057	0.002	0.004	0.217	0.011	0.001
Appendicularia large	7.976	1.742	0	0	4.278	0.219	0	8.142	2.652	0	1.755	0.188	0.029	2.251	0.011	0.048	0.025	0	0.86	0	0	2.547	0	0	0.391	0	0	1.089	0.075	0	0.411	0.064	0.073	1.693	0.99	0.264	0	2.125	0.035	0	0.136	0.089	0
Salpae	0	0	0	0	0	0	0	0	0	0	0	0	0	0	0	0	0	0.18	0	0	0	0	0	0	0	0	0	0	0	0	0	0	0	0	0	0	0	0	0	0	0.282	0.023	0
Ova	2.452	0.299	0.022	0.004	1.836	0.203	0.014	2.343	0.368	0.02	0.636	0.018	0.017	0.422	0.052	0.01	0.028	0.01	0.261	0.002	0.008	1.529	0.117	0.012	1.029	0.029	0.009	1.249	0.069	0.021	1.154	0.064	0.014	1.703	0.479	0.014	0.004	0.622	0.102	0.011	1.024	0.077	0.038
Larvae gen.sp.	0.009	0.025	0	0	0	0.005	0	0	0.03	0	0	0.005	0	0.017	0.003	0	0	0	0	0	0	0	0.006	0	0	0.007	0	0	0	0	0	0.004	0	0	0.006	0	0	0	0.01	0	0	0	0
Fish ova	0	0.005	0.077	0.005	0	0	0	0	0	0	0	0	0	0	0	0	0	0	0	0	0	0	0	0	0	0	0	0	0	0	0	0	0	0	0	0	0	0	0	0	0.02	0.021	0.016
Fish larvae	0	0	0	0	0	0	0	0	0	0	1.038	0	0	20.345	0	0	0	0	301.339	0	0	0	3.038	0	0	0	0	0	0	0	0	0	0	0	308.953	0	0	0	0	0	4.395	0	0
SUM	51.13	37.259	56.786	9.657	22.388	44.18	1.249	28.187	107.422	2.706	73.727	2.913	2.688	80.968	23.152	8.014	44.8	3.582	360.936	0.425	5.103	55.543	55.265	4.44	41.304	60.966	6.647	43.729	35.862	4.441	1882.87	29.523	4.3	54.87	395.524	44.259	0.746	48.695	12.855	5.846	29.545	3.982	2.367
